# Supplementary material for: Prognostic relevance of serum lactate kinetics in critically ill patients
Source: Springer Nature journal article supplement (doi:10.1007/s00134-018-5475-3), 2018-11-26
Supplement: MOESM2 [file 16295110]

**Supplementary material**

**Supplementary Table 1 Baseline characteristics of excluded patients with maximum lactate concentration on admission day below 2.0 mmol/l**

|  | **mean** | **SEM** |
| --- | --- | --- |
| age | 65.50 | 13.49 |
| BMI (kg/m²) | 27.83 | 5.45 |
| SAPS II (pts) | 37.02 | 16.88 |
| APACHE II (pts) | 19.36 | 8.96 |
| lactate (mmol/l) |  |  |
| lactate (mmol/l) day 1 | 1.26 | 0.39 |
| lactate (mmol/l) day 2 | 1.53 | 1.13 |
| PCT (mmol/l) | 9.27 | 32.0 |
| glucose (mmol/l) | 9.69 | 9.82 |
| haemoglobine (mmol/L) | 7.84 | 3.10 |
| ASAT (µmol/l*s) | 1.81 | 2.73 |
| ALAT (µmol/l*s) | 0.90 | 1.78 |
| gamma GT (µmol/l*s) | 1.58 | 2.43 |
| leucocytes (g/l) | 11.06 | 10.33 |
| BUN (mg/dl) | 10.75 | 10.02 |
| creatinine (mg/dl) | 144.79 | 151.13 |

**Supplementary Table 2 Δ24Lac ≤19% is associated with ICU mortality regardless of admission diagnosis**

| **admission diagnosis** | **OR** | **95%CI** | **p-value** |
| --- | --- | --- | --- |
|
| sepsis | 3.55 | 2.35-5.37 | <0.001 |
| AHF | 6.38 | 3.64-1.18 | <0.001 |
| pneumonia | 3.12 | 1.90-5.13 | <0.001 |
| pulmonary embolism | 6.48 | 1.91-22.01 | 0.003 |
| ACS | 2.85 | 1.74-4.68 | <0.001 |

*OR* odds ratio, *CI* confidence interval, *AHF* acute heart failure, *ACS* acute coronary syndrome

**Supplementary Fig. 1** Flow chart of study cohort
